# Supplementary material for: When are performance-approach goals more adaptive for Chinese EFL learners? It depends on their underlying reasons
Source: publisher site journal article supplement (doi:10.1515/iral-2021-0208), 2022-05-09
Supplement: Supplementary file 1 [file j_iral-2021-0208_suppl.docx]

# Appendixes

## APPENDIX A

Scree Plot from the Initial Exploratory Factor Analysis on Items Related to Reasons for Performance Approach Goals


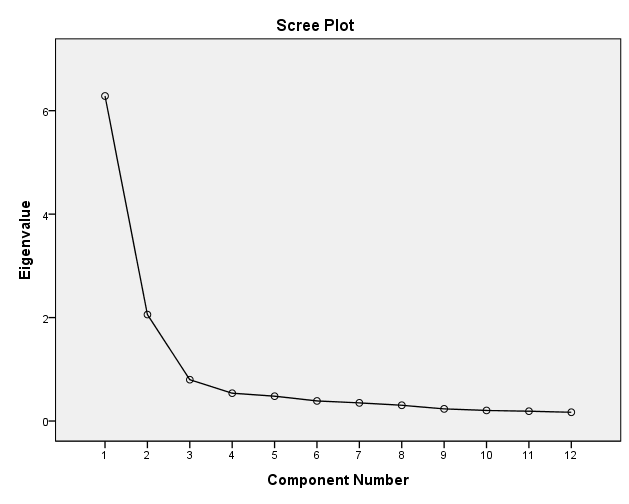


## APPENDIX B

Exploratory Factor Analysis on Underlying Reasons of Performance Approach Goals

|  | |  |  | |  | **Pattern matrix** | |  |
| --- | --- | --- | --- | --- | --- | --- | --- | --- |
| **I want to do better than other in English because…** | **SDT labels** | | | ***M*** | ***SD*** | **Contr**  **R** | **Auto**  **R** | ***h*** |
| Q8-1 its fun and enjoyable. | intrinsic | | | 3.70 | 1.348 |  | .760 | .591 |
| Q8-8 it provides a personal challenge. | intrinsic | | | 3.88 | 1.289 |  | .815 | .642 |
| Q8-3 it will make me feel proud. | pride | | | 3.78 | 1.300 |  | .764 | .620 |
| Q8-4 it is important to my personal or career development. | identified | | | 3.44 | 1.383 |  | .597 | .542 |
| Q8-10 it is good for me. | identified | | | 3.76 | 1.349 |  | .919 | .771 |
| Q8-12 it makes me feel good. | pride | | | 3.82 | 1.271 |  | .865 | .728 |
| Q8-5 it makes me feel ashamed if I don’t. | shame | | | 2.63 | 1.362 | .915 |  | .813 |
| Q8-6 my parents demand that I do so. | extrinsic | | | 2.47 | 1.354 | .616 |  | .381 |
| Q8-11it brings rewards from teachers or parents. | extrinsic | | | 2.42 | 1.336 | .604 |  | .406 |
| Q8-2 I will feel guilty or anxious if I don’t. | introjected | | | 2.35 | 1.359 | .781 |  | .626 |
| Q8-7 it’s my duty to do better than others. | introjected | | | 2.93 | 1.384 | .774 |  | .682 |
| Q8-9 I will feel ashamed if I don’t do better than others. | shame | | | 2.44 | 1.271 | .965 |  | .837 |
| 69.6% of Variance |  | | |  |  | 52.4% | 17.2% |  |
| *M(SD)* |  | | |  | 3.73(1.32) | | 2.54(1.34) | |
| Cronbach’s alpha |  | | |  |  | .90 | .92 |  |

## APPENDIX C

Scales used in the present study

| **Scales (English)** | **Scales (Chinese)** |
| --- | --- |
| **[English] Performance-approach Goal**   1. It is important for me to do better [in English] than other students are. 2. It is important for me to do well [in English] compared to others in this class. 3. My goal in this class is to get a better grade [in English] than most of the other students. | **[英语]成绩目标定向**   1. 对我而言，英语超过其他同学很重要。 2. 对我而言，比班里其他同学的英语好很重要。 3. 我的目标是英语成绩要超过班里的大部分同学。 |
| **Reasons for adopting performance approach goals [in English class]**  “*I am striving to do well compared to others in this class*”. *Assume you agreed, even if only a little with this statement. What reason(s) motivate you to pursue this goal in your class*?   1. Doing better than others is fun and enjoyable. 2. Doing better than others provides a personal challenge. 3. If I don’t do better than others, I will feel guilty or anxious 4. It is my duty to do better than others 5. Doing better than others is important to my personal or career development. 6. Doing better than others is good for me. 7. I want to do better than others because my parents demand that I do so. 8. Doing better than others will bring rewards from teachers or parents. 9. I will feel shame if I don’t do better than others. 10. If I don’t do better than others I will feel ashamed. 11. Doing better than others will make me feel proud. 12. I’ll feel good if I do better than others. | **[英语课堂中]努力超越别人的原因**  假设你同意“我努力超越班里的其他同学”的这个陈述，即便只有些许认同。请问是哪些原因促使你在班级里实现该目标？   1. 超越别人是一种乐趣和享受。 2. 超越别人对于我个人来说也是一种挑战。 3. 如果没有超过别人，我会产生负罪感和焦虑心理。 4. 超越别人是我的任务。 5. 超越别人对于我个人或者以后事业发展很重要。 6. 超越别人对我个人来说是一件好事。 7. 我想超越别人，因为我父母要求我这样做。 8. 超越别人，父母或老师会给我奖励。 9. 如果没有超越别人，我感到羞愧。 10. 如果没有超过别人，我会感到很丢人。 11. 超越别人让我感到很自豪。 12. 如果超越别人，我的自我感觉会很好。 |
| **[English] Learning anxiety**   1. Before writing in the English language, I feel nervous and uneasy. 2. I get so nervous when required to write in the English language I wish the class was over. 3. I worry that writing in the English language is too difficult. 4. I worry whether I have practiced enough when required to read in the English language. 5. I am very nervous when required to read in the English language. 6. I feel sick to my stomach when required to read in the English language. 7. I feel panicky when listening in the English language. 8. I worry if I will be able to listen in the English language effectively. 9. I worry if I will be able to speak in the foreign language effectively. 10. When I am required to speak in the English language, my heart begins to pound. 11. When I am required to speak in the English language, my voice gets shaky. 12. I get so nervous when required to speak in the English language I wish I did not have to participate in class discussions. | **[英语]学习焦虑度**   1. 在用英语写作之前，我感到紧张和不自在。 2. 当需要用英语写作时，我很紧张并希望赶快下课。 3. 我担心英语写作对我来说太困难。 4. 当要求阅读英语的时候，我担心自己是否进行过足够的练习。 5. 当要求阅读英语时，我感到非常紧张。 6. 当要求阅读英语的时候，我会感到胃不舒服。 7. 当听英语时，我感到恐慌。 8. 我担心自己是否能有效得听懂英语。 9. 我担心自己是否能有效的讲英语。 10. 当要求说英语时，我会心跳加快。 11. 当要求用英语讲话的时候， 我的声音会变得颤抖。 12. 当要求用英语讲话的时候，我感到紧张并希望自己不用参与课堂讨论。 |
| **[English] Self-efficacy**  *How certain are you that…*   1. Write your teacher an e-mail in English. 2. Write answers in English in order to complete a homework assignment. 3. Write a story in English. 4. Write a report on a book that I read in English. 5. Complete an essay examination in English. 6. Write in a discussion post in English. 7. Read a magazine in English. 8. Read a course syllabus written in English. 9. Read another student’s essay written in English. 10. Read a story written in English. 11. Comprehend written exam questions on an English examination. 12. Read homework instructions in English. 13. Understand my classmates’ oral communication in English. 14. Understand a native speaker’s oral communication in English. 15. Understand class instructions spoken in English. 16. Understand class discussions in English. 17. Understand my English teacher’s spoken directions for an activity. 18. Pass an exam in which I must answer questions relating to a spoken scenario in English. 19. Conduct an oral presentation in English. 20. Orally communicate with a native speaker of English. 21. Present a group presentation in English. 22. Participate in class discussions in English. 23. Ask the teacher a question in English. 24. Speak in English to other students during group work activities. | **[英语]学习自信度**  标出你在做以下活动时的确信度:   1. 给老师用英语写电子邮件。 2. 用英语写答案完成作业。 3. 用英语写故事。 4. 为英语书籍写报告。 5. 完成英语作文考试。 6. 网上讨论时用英语留言。 7. 阅读英语杂志。 8. 阅读用英语写成的课程大纲。 9. 阅读其他同学的英语作文。 10. 阅读英语故事。 11. 理解英语考试卷面上的英语问题。 12. 阅读作业的英语说明。 13. 理解同班同学的英语口语交流。 14. 听懂母语是英语的人的口语交际。 15. 听懂用英语授课的课堂教学。 16. 听懂英语课堂讨论。 17. 听懂英语老师对课堂活动的英语说明。 18. 通过考英语考试，在考试中我必须用英语回答口语交际情形中一些的问题。 19. 用英语做演讲。 20. 与母语是英语的人进行口语交际。 21. 做英语小组演讲。 22. 用英语参加课堂讨论。 23. 用英语向老师提问问题。 24. 小组活动的时候，和其他同学用英语讲话。 |
